# Supplementary material for: The Contribution of Theoretical Prediction Studies to the Antioxidant Activity Assessment of the Bioactive Secoiridoids Encountered in Olive Tree Products and By-Products
Source: MDPI journal article supplement (doi:10.3390/molecules28052267), 2023-02-28
Supplement: s1 [file s1]

Table S1. Secoiridoids and other phenolic compounds reported in olive tree products and by products\*

| No                                       | Phenolic compounds                                                                                           | References                          | Molecular Mass | Olive Fruit | Olive Pulp/Mesocarp | Olive Seed/Stone | Virgin Olive Oil | Leaves | Olive Pomace | Olive Mill Wastewater, OMW |
|------------------------------------------|--------------------------------------------------------------------------------------------------------------|-------------------------------------|----------------|-------------|---------------------|------------------|------------------|--------|--------------|----------------------------|
| Secoiridoids                             |                                                                                                              |                                     |                |             |                     |                  |                  |        |              |                            |
| <b>Oleuropein and related compounds</b>  |                                                                                                              |                                     |                |             |                     |                  |                  |        |              |                            |
| 1                                        | Oleuropein glucoside (di)                                                                                    | [57,65]                             | 702.2          |             |                     |                  |                  | +      |              |                            |
| 2                                        | Methoxy-oleuropein                                                                                           | [57,63]                             | 570.5          |             |                     |                  |                  | +      |              |                            |
| 3                                        | Hydroxy-oleuropein                                                                                           | [63]                                | 556.2          |             |                     |                  |                  |        |              |                            |
| 4                                        | Oleuropein                                                                                                   | [56,57,58,59,60,61,62,69, 70,73,75] | 540.5          | +           | +                   | +                |                  | +      | +            | +                          |
| 5                                        | Oleuropein derivative                                                                                        | [63]                                | 528.2          |             |                     |                  |                  | +      |              |                            |
| 6                                        | Demethyl-oleuropein                                                                                          | [56,57,63,73,75,76]                 | 526.5          | +           | +                   |                  |                  | +      |              |                            |
| 7                                        | 10-Hydroxy-oleuropein aglycone                                                                               | [64]                                | 396.4          |             |                     |                  | +                |        | +            |                            |
| 8                                        | Oleuropein aglycone oxidized aldehyde and hydroxylic form/carboxylic form of oleuropein aglycone             | [60,72]                             | 394.1          |             |                     |                  | +                |        |              |                            |
| 9                                        | Oleuropein aglycone/3,4-DHPEA-EA                                                                             | [58,59,61,63,70,73,74,75]           | 378.4          | +           |                     |                  | +                | +      | +            |                            |
| 10                                       | Aldehydic form of oleuropein aglycone                                                                        | [59,60,70]                          | 377.4          |             |                     |                  | +                |        |              |                            |
| 11                                       | Dialdehydic form of oleuropein aglycone/Oleuropeindial                                                       | [60,64,73,74]                       | 376.4          |             |                     |                  | +                |        |              |                            |
| 12                                       | Enolic tautomer of the dialdehydic form of oleuropein aglycone/Oleomissional                                 | [64,71]                             | 365.4          |             |                     |                  | +                |        |              |                            |
| 13                                       | Oleuropein aglycone derivative                                                                               | [63]                                | 360.1          |             |                     |                  |                  |        | +            |                            |
| 14                                       | 10-Hydroxy-decarboxymethyl oleuropein aglycone                                                               | [64]                                | 336.1          |             |                     |                  | +                |        | +            | +                          |
| 15                                       | Decarboxymethyl oleuropein aglycone oxidised dialdehyde form/Oleaceinic acid                                 | [60,69,72]                          | 336.1          |             |                     | +                | +                |        |              |                            |
| 16                                       | Dialdehydic form of decarboxymethyl elenolic acid linked to 3,4-DHPEA/Deacetoxy oleuropein aglycone/Oleacein | [59,60,61,63,73,74]                 | 320.3          |             |                     |                  | +                |        |              |                            |
| 17                                       | Decarboxymethyl (deacetoxy) form of oleuropein aglycone                                                      | [64,70,73]                          | 319.3          |             |                     |                  | +                |        |              | +                          |
| <b>Ligstroside and related compounds</b> |                                                                                                              |                                     |                |             |                     |                  |                  |        |              |                            |
| 18                                       | Ligstroside                                                                                                  | [56,61,63]                          | 524.5          | +           | +                   |                  |                  | +      |              |                            |
| 19                                       | Ligstroside aglycone oxidized aldehyde and hydroxylic form/carboxylic form of ligstroside aglycone           | [60,72]                             | 378.1          |             |                     |                  | +                |        |              |                            |
| 20                                       | Methyl acetal of ligstroside aglycone                                                                        | [66–68]                             | 375.4          | +           |                     |                  |                  |        |              |                            |
| 21                                       | Ligstroside aglycone/p-HPEA-EA                                                                               | [57,59,63,70,73,74,75]              | 362.1          |             |                     |                  | +                | +      |              |                            |

|                           |                                                                                                                                                                                                                                        |                              |       |   |  |   |   |  |   |   |   |
|---------------------------|----------------------------------------------------------------------------------------------------------------------------------------------------------------------------------------------------------------------------------------|------------------------------|-------|---|--|---|---|--|---|---|---|
| 22                        | Aldehydic form of ligstroside aglycone/Ligstral                                                                                                                                                                                        | [59,60,70]                   | 361.4 |   |  |   | + |  | + |   | + |
| 23                        | Dialdehydic form of ligstroside aglycone/Ligstrodial                                                                                                                                                                                   | [60,64,73,74]                | 361.4 |   |  |   | + |  | + |   |   |
| 24                        | Enolic tautomer of the dialdehydic form of ligstroside aglycone/Oleokoronal                                                                                                                                                            | [64,71]                      | 361.4 |   |  |   | + |  | + |   | + |
| 25                        | Decarboxymethyl ligstroside aglycone oxidised dialdehyde form/Oleocanthalic acid                                                                                                                                                       | [60,72]                      | 320.1 |   |  |   | + |  |   |   |   |
| 26                        | Decarboxymethyl (deacetoxy) form of ligstroside aglycone                                                                                                                                                                               | [64,73]                      | 304.3 |   |  |   | + |  |   |   |   |
| 27                        | Dialdehydic form of decarboxymethyl elenolic acid linked to p-HPEA/Oleocanthal/Deacetoxy ligstroside aglycone                                                                                                                          | [59,60,61,63,70,73,74]       | 304.3 |   |  |   | + |  | + |   |   |
| <b>Other secoiridoids</b> |                                                                                                                                                                                                                                        |                              |       |   |  |   |   |  |   |   |   |
| 28                        | Nuzhenide oleoside                                                                                                                                                                                                                     | [56]                         | 1059  |   |  |   | + |  | + |   |   |
| 29                        | Methyl (5E,6S)-5-ethylidene-4-[2-oxo-2-[[[(2R,3S,4S,5R,6R)-3,4,5-trihydroxy-6-[2-(4-hydroxyphenyl)ethoxy]oxan-2-yl]methoxy]ethyl]-6-[(2S,3R,4S,5S,6R)-3,4,5-trihydroxy-6-(hydroxymethyl)oxan-2-yl]oxy-4H-pyran-3-carboxylate/Nuzhenide | [56,61,65]                   | 686.2 | + |  |   | + |  | + | + | + |
| 30                        | Methyl 4-[2-[2-(3,4-dihydroxyphenyl)ethoxy]-2-oxoethyl]-3-ethenyl-2-[3,4,5-trihydroxy-6-(hydroxymethyl)oxan-2-yl]oxy-3,4-dihydro-2H-pyran-5-carboxylate/Oleuroside                                                                     | [56,57,63]                   | 540.5 |   |  |   |   |  | + |   |   |
| <b>Flavonoids</b>         |                                                                                                                                                                                                                                        |                              |       |   |  |   |   |  |   |   |   |
| 31                        | Luteolin-7-O-rutinoside                                                                                                                                                                                                                | [56,57,58,63,65]             | 610.5 |   |  |   |   |  | + | + | + |
| 32                        | Luteolin diglucoside                                                                                                                                                                                                                   | [57,59,65]                   | 610.5 |   |  |   |   |  | + | + |   |
| 33                        | (2S)-3',5-Dihydroxy-4'-methoxy-7-[α-L-rhamnopyranosyl-(1→6)-β-D-glucopyranosyloxy]flavan-4-one/Hesperidin/Hesperetin 7-rutinoside                                                                                                      | [56, 65]                     | 610.6 | + |  | + |   |  | + |   |   |
| 34                        | Quercetin rutinoside (3)/Rutin                                                                                                                                                                                                         | [56,57,58,61,62,63,65,70,75] | 610.5 | + |  | + |   |  | + | + | + |
| 35                        | Cyanidin-3-rutinoside                                                                                                                                                                                                                  | [66—68]                      | 595.5 |   |  |   |   |  |   |   |   |
| 36                        | Apigenin diglucoside                                                                                                                                                                                                                   | [57]                         | 594.5 |   |  |   |   |  | + |   |   |
|                           | Apigenin rutinoside                                                                                                                                                                                                                    | [57,63,66—68,70]             | 578.5 | + |  | + |   |  | + | + |   |
| 37                        | (2S,3R,4S,5S,6R)-2-[2-(3,4-Dihydroxyphenyl)-5,7-                                                                                                                                                                                       | [65,75]                      | 484.8 | + |  | + |   |  | + |   |   |

|                |                                                                                                                                     |                           |       |   |  |   |   |   |   |
|----------------|-------------------------------------------------------------------------------------------------------------------------------------|---------------------------|-------|---|--|---|---|---|---|
|                | dihydroxychromenylium-3-yl]oxy-6-(hydroxymethyl)oxane-3,4,5-triol/Cyanidin-3-glucoside                                              |                           |       |   |  |   |   |   |   |
| 38             | Diosmetin-7-O-glucoside                                                                                                             | [65]                      | 462.4 |   |  |   |   | + |   |
| 39             | 5-Hydroxy-2-(4-hydroxy-3-methoxyphenyl)-7-[[3,4,5-trihydroxy-6-(hydroxymethyl)oxan-2-yl]oxy]chromen-4-one/Chrysoeriol-7-O-glucoside | [57,63]                   | 462.4 |   |  |   |   | + |   |
| 40             | Luteolin-4'-O-glucoside                                                                                                             | [63]                      | 448.4 |   |  |   |   | + | + |
| 41             | Luteolin-5-O-glucoside                                                                                                              | [61,70]                   | 448.4 | + |  |   |   |   |   |
| 42             | Luteolin-7-O-glucoside                                                                                                              | [56,58,60,61,63,65,70,75] | 448.4 | + |  | + |   | + | + |
| 43             | Quercetin-3-rhamnoside                                                                                                              | [66–68]                   | 448.4 | + |  |   |   |   |   |
| 44             | Apigenin-7-O-glucoside                                                                                                              | [56,57,61,63,65,70]       | 432.4 | + |  | + |   | + |   |
| 45             | 3,4',5,7-Tetrahydroxy-3'-methoxyflavone/Isorhamnetin                                                                                | [57]                      | 316.3 |   |  |   |   |   |   |
| 46             | 4',5-Dihydroxy-6,7-dimethoxyflavone/Cirsimaritin                                                                                    | [65]                      | 314.3 |   |  |   |   | + |   |
| 47             | Gallocatechin                                                                                                                       | [57]                      | 306.3 |   |  |   |   | + |   |
| 48             | (2R,3R)-3,3',4',5,7-Pentahydroxyflavan-4-one/Taxifolin                                                                              | [59,63,70]                | 304.3 |   |  |   | + | + |   |
| 49             | 3,3',4',5,7-Pentahydroxyflavone/Quercetin                                                                                           | [56,57,58,63]             | 302.2 |   |  | + |   | + | + |
| 50             | 5,7,3'-Trihydroxy-4'-methoxyflavone/Diosmetin                                                                                       | [57]                      | 300.3 |   |  |   |   | + |   |
| 51             | (2R,3S)-2-(3,4-Dihydroxyphenyl)-3,4-dihydro-2H-chromene-3,5,7-triol/Catechin                                                        | [57,65]                   | 290.3 |   |  |   |   | + |   |
| 52             | 2-(3,4-Dihydroxyphenyl)-5,7-dihydroxychroman-4-one/Eriodictyol                                                                      | [63]                      | 288.3 |   |  |   |   | + |   |
| 53             | 3',4',5,7-tetrahydroxyflavone/Luteolin                                                                                              | [56,57,58,59,61,62,63,65] | 286.2 |   |  | + | + | + | + |
| 54             | (2S)-4',5,7-Trihydroxyflavan-4-one/Naringenin                                                                                       | [62]                      | 272.3 |   |  |   |   |   | + |
| 55             | 4',5,7-trihydroxyflavone/Apigenin                                                                                                   | [56,57,58,59,61,63]       | 270.3 |   |  |   | + | + | + |
| 56             | Luteolin-hexoside                                                                                                                   | [63]                      | 448.1 |   |  |   |   | + | + |
| <b>Lignans</b> |                                                                                                                                     |                           |       |   |  |   |   |   |   |
| 57             | 4,4'-[(1R,3aS,4R,6aS)-tetrahydro-1H,3H-furo[3,4-c]furan-1,4-diyl]bis(2,6-dimethoxyphenol)/Syringaresinol                            | [65]                      | 418.4 |   |  |   |   | + |   |
| 58             | [(3R,3aS,6S,6aR)-3,6-bis(4-hydroxy-3-methoxyphenyl)-3,4,6,6a-tetrahydro-1H-furo[3,4-c]furan-3a-yl] acetate/1-Acetoxy-pinorensinol   | [58, 60, 62, 69, 74]      | 416.4 |   |  | + | + | + | + |
| 59             | 1-Hydroxy-pinorensinol                                                                                                              | [59,70]                   | 372.4 |   |  |   |   | + |   |

|                |                                                                                                                                                      |                                       |       |   |   |  |   |   |   |   |   |
|----------------|------------------------------------------------------------------------------------------------------------------------------------------------------|---------------------------------------|-------|---|---|--|---|---|---|---|---|
| 60             | 4-[(3S,3aR,6S,6aR)-6-(4-Hydroxy-3-methoxyphenyl)-1,3,3a,4,6,6a-hexahydrofuro[3,4-c]furan-3-yl]-2-methoxyphenol/Pinoresinol                           | [58,59,61,63,70,75]                   | 358.4 |   | + |  | + | + | + | + | + |
| Phenolic acids |                                                                                                                                                      |                                       |       |   |   |  |   |   |   |   |   |
| 61             | <i>p</i> -Coumaroyl-6'-secologanoside/Comselogoside                                                                                                  | [62]                                  | 536.2 |   |   |  |   |   |   |   |   |
| 62             | (1S,3R,4R,5R)-3-[[ (2E)-3-(3,4-dihydroxyphenyl)prop-2-enoyl]oxy]-1,4,5-trihydroxycyclohexane-1-carboxylic acid/Chlorogenic acid/Caffeoyl-quinic acid | [56,57,60,61,62,63,65,70,75]          | 354.3 | + | + |  |   | + | + |   |   |
| 63             | (2R,3R)-2-[[ (2E)-3-(3,4-Dihydroxyphenyl)prop-2-enoyl]oxy]-3-hydroxybutanedioic acid/Caftaric acid                                                   | [65]                                  | 312.2 |   |   |  |   | + |   |   |   |
| 64             | (2E)-3-(4-Hydroxy-3,5-dimethoxyphenyl)prop-2-enoic acid/Sinapinic acid                                                                               | [56,58,59,61,73,75]                   | 224.2 | + |   |  | + |   |   |   | + |
| 65             | 4-Hydroxy-3,5-dimethoxybenzoic acid/Syringic acid                                                                                                    | [56,57,58,61,65,70,73,74,75]          | 198.2 | + | + |  | + | + |   |   | + |
| 66             | 3-(4-Hydroxy-3-methoxyphenyl)-2-propenoic acid/Ferulic acid                                                                                          | [56,57,59,60,61,62,63,65,70,73,75]    | 194.2 | + | + |  | + | + | + |   |   |
| 67             | 3,4-Dimethoxybenzoic acid/Veratric acid                                                                                                              | [56,58,63]                            | 182.2 |   | + |  |   |   |   |   | + |
| 68             | (4-hydroxy-3-methoxyphenyl)acetic acid/Homovanillic acid                                                                                             | [56,59,62,65,73,75]                   | 182.2 | + | + |  | + | + | + |   |   |
| 69             | 3-(3,4-Dihydroxyphenyl)propanoic acid/Dihydrocaffeic acid                                                                                            | [59,70,75]                            | 182.2 | + | + |  | + |   |   |   |   |
| 70             | 3-(3,4-Dihydroxyphenyl)-2-propenoic acid/Caffeic acid                                                                                                | [56,57,58,59,60,61,62,63,65,73,74,75] | 180.2 | + | + |  | + | + | + |   | + |
| 71             | 3,4,5-Trihydroxybenzoic acid/Gallic acid                                                                                                             | [56,57,58,59,60,61,63,64,70,73,74]    | 170.1 | + | + |  | + | + | + |   | + |
| 72             | 4-Hydroxy-3-methoxybenzoic acid/Vanillic acid                                                                                                        | [56,57,59,60,61,62,63,70,73,74,75]    | 168.2 | + | + |  | + | + | + |   | + |
| 73             | 3,4-Dihydroxyphenylacetic acid/Homoprotocatechuic acid                                                                                               | [59,70,75]                            | 168.2 | + | + |  | + |   |   |   |   |
| 74             | (2E)-3-(3-Hydroxyphenyl)prop-2-enoic acid/m-Coumaric acid                                                                                            | [80]                                  | 164.2 | + | + |  |   |   |   |   |   |
| 75             | (2E)-3-(2-Hydroxyphenyl)prop-2-enoic acid/o-Coumaric acid                                                                                            | [55, 58, 59, 60, 72, 73, 74]          | 164.2 | + | + |  | + |   |   |   |   |
| 76             | (2E)-3-(4-Hydroxyphenyl)prop-2-enoic acid/p-Coumaric acid                                                                                            | [56,57,58,59,60,61,62,63,73,74,75]    | 164.2 | + | + |  | + | + | + |   | + |
| 77             | 2,5-Dihydroxy benzoic acid/Gentisic acid                                                                                                             | [59,73]                               | 154.1 |   |   |  | + |   |   |   |   |
| 78             | 2,4-Dihydroxy benzoic acid/ $\beta$ -Resorcylic acid                                                                                                 | [70]                                  | 154.1 |   |   |  |   |   |   |   |   |

[illegible]

|                            |                                                                  |                  |       |   |   |   |   |   |
|----------------------------|------------------------------------------------------------------|------------------|-------|---|---|---|---|---|
| 99                         | 3,4-Dihydroxyphenylglycol/4-(1,2-dihydroxyethyl)benzene-1,2-diol | [58,62,63,70,75] | 170.2 | + |   |   | + | + |
| 100                        | 4-Hydroxy-3-methoxybenzaldehyde/Vanillin                         | [57,65,74]       | 152.2 |   | + | + | + | + |
| 101                        | Benzene-1,2-diol/Catechol                                        | [58]             | 110.1 |   |   |   |   | + |
| <b>Hydroxy-isochromans</b> |                                                                  |                  |       |   |   |   |   |   |
| 102                        | 1-(3'-Methoxy-4'-hydroxy)phenyl-6,7-dihydroxyisochroman          | [59,7]           | 288.3 |   | + |   |   |   |
| 103                        | 1-Phenyl-6,7-dihydroxyisochroman                                 | [59,70]          | 242.3 |   | + |   |   |   |

\*Within each category compounds 1-103 are presented on descending molecular mass order
